# Supplementary material for: High Temperatures and Kidney Disease Morbidity: A Systematic Review and Meta-analysis
Source: PubMed Central journal article supplement — J Prev Med Public Health. 2018 Nov 20;52(1):1–13. doi: 10.3961/jpmph.18.149 (PMC6378387; doi:10.3961/jpmph.18.149), 2018-11-20
Supplement: jpmph-52-1-1-suppl.pdf [file jpmph-52-1-1-suppl.pdf]

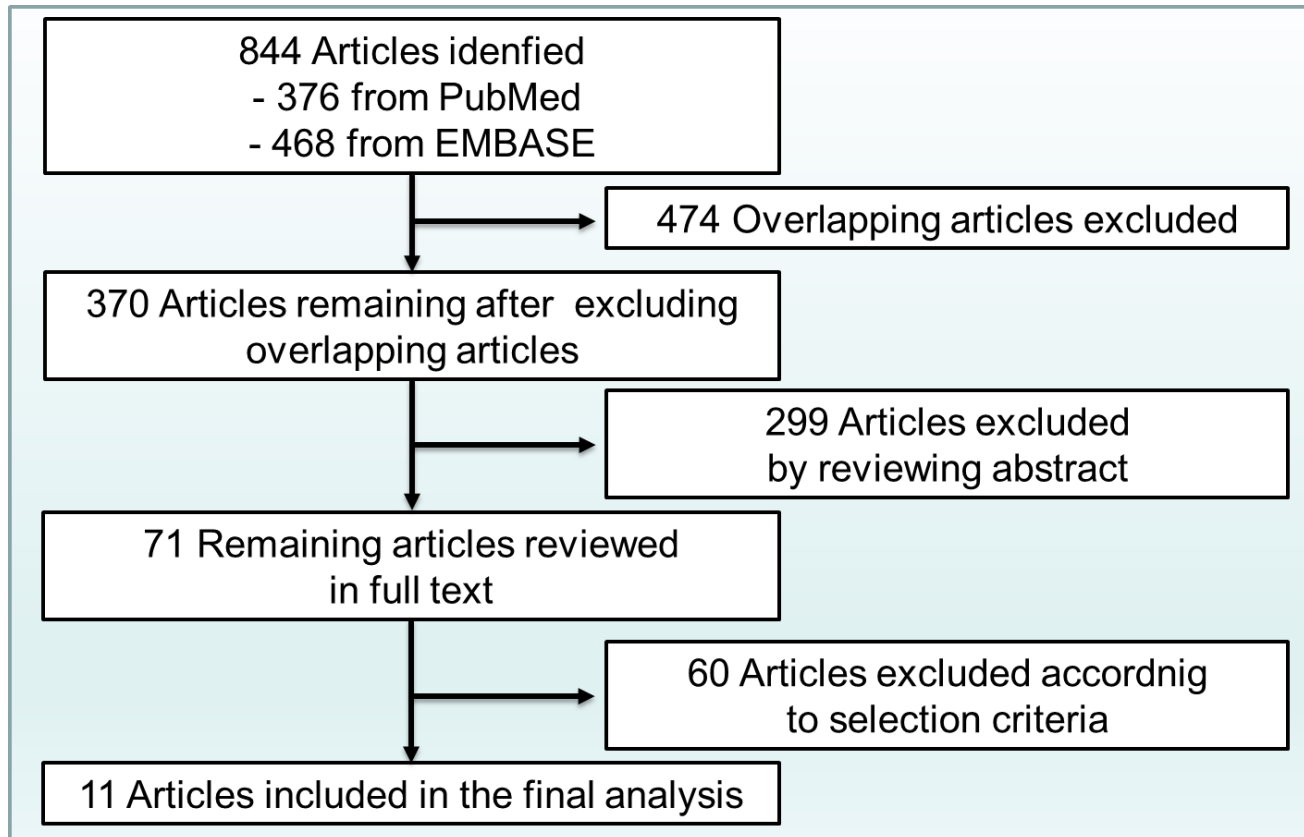

**Supplementary Figure 1. Selection process of research for systematic review and meta-analysis.**

The studies to be analyzed were limited to studies on human population and included all ages. Research designs included in the analysis were case-crossover studies, cohort studies, and time series analysis. We excluded reviews, letters, case reports, gray literature, pre-clinical studies, and also excluded studies that did not have abstract or full text.

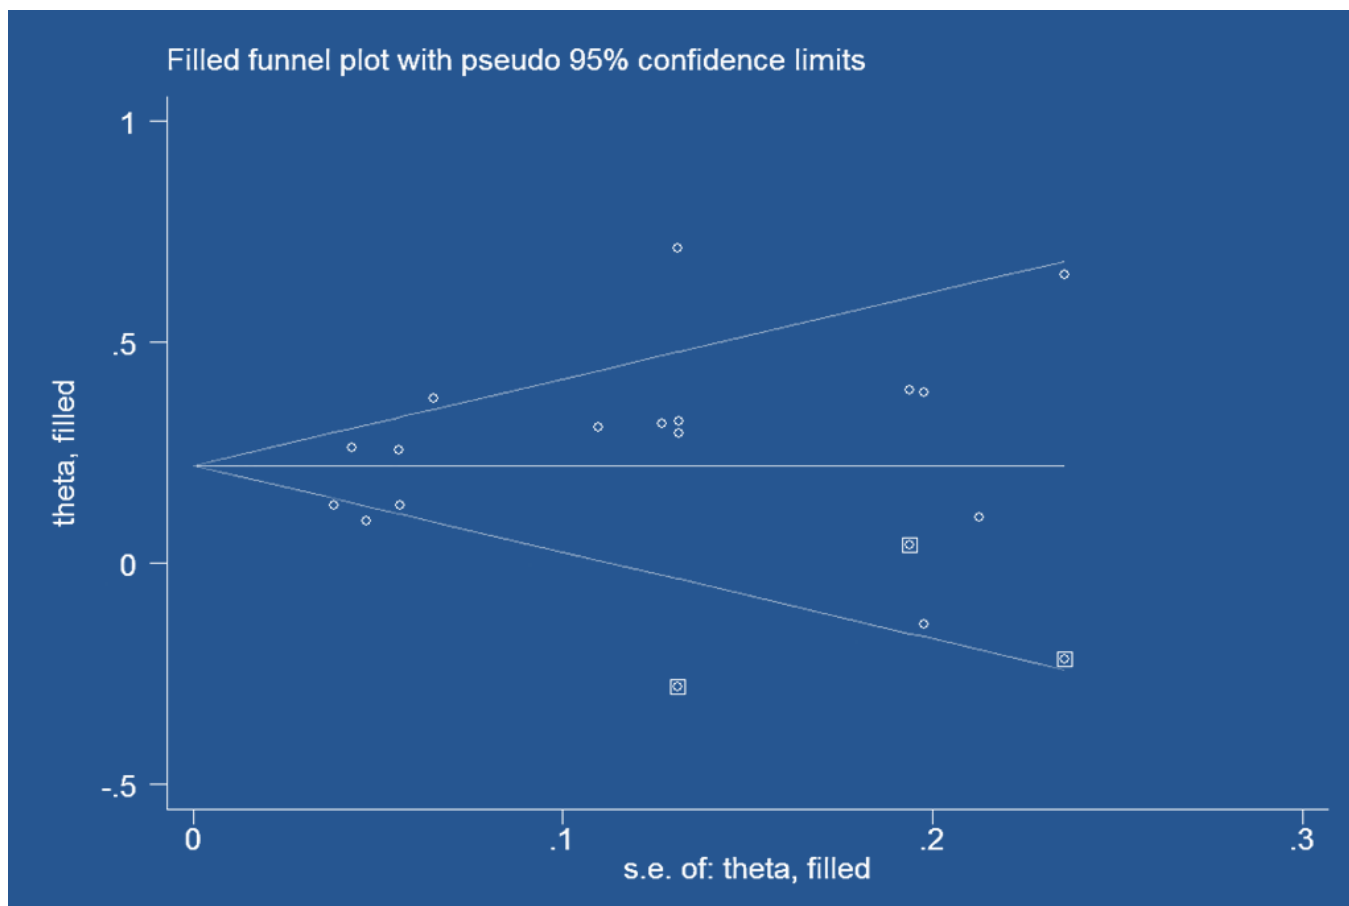

Supplementary Figure 2. Funnel plot for the possibility of publication bias in meta-analysis.

**Supplementary Table 1. The quality evaluation of the studies included in the meta-analysis through Newcastle-Ottawa scale.**

| Study                       | Selection                                |                                     | Comparability             |                                               | Outcome                                                         |                       |                     | Total | Quality* |                                  |
|-----------------------------|------------------------------------------|-------------------------------------|---------------------------|-----------------------------------------------|-----------------------------------------------------------------|-----------------------|---------------------|-------|----------|----------------------------------|
|                             | Representativeness of the exposed cohort | Selection of the non-exposed cohort | Ascertainment of exposure | Outcome not present at the start of the study | Comparability of cohorts on the basis of the design or analysis | Assessment of outcome | Length of follow-up |       |          | Adequacy of follow-up of cohorts |
| Hansen et al., 2008 [12]    | ★                                        | ★                                   | ★                         | –                                             | ★                                                               | ★                     | ★                   | ★     | ★★★★★★   | Good                             |
| Pincus et al., 2010 [26]    | ★                                        | ★                                   | ★                         | –                                             | ★                                                               | ★                     | ★                   | ★     | ★★★★★★   | Good                             |
| Tawatsupa et al., 2012 [27] | –                                        | ★                                   | –                         | ★                                             | ★                                                               | –                     | ★                   | ★     | ★★★★★    | Fair                             |
| Lin et al., 2013 [10]       | ★                                        | ★                                   | ★                         | –                                             | ★★                                                              | ★                     | ★                   | ★     | ★★★★★★   | Good                             |
| Bobb et al., 2014 [28]      | –                                        | ★                                   | ★                         | ★                                             | ★                                                               | ★                     | ★                   | ★     | ★★★★★★   | Good                             |
| Tasian et al., 2014 [22]    | ★                                        | ★                                   | ★                         | ★                                             | ★                                                               | ★                     | ★                   | ★     | ★★★★★★   | Good                             |
| Ordon et al., 2016 [23]     | ★                                        | ★                                   | ★                         | ★                                             | ★★                                                              | ★                     | ★                   | ★     | ★★★★★★   | Good                             |
| Yang et al., 2016 [24]      | ★                                        | ★                                   | ★                         | –                                             | ★                                                               | ★                     | ★                   | ★     | ★★★★★★   | Good                             |
| Moyce et al., 2017 [29]     | –                                        | ★                                   | ★                         | –                                             | ★                                                               | ★                     | –                   | ★     | ★★★★★    | Fair                             |
| Ogbomo et al., 2017 [30]    | ★                                        | ★                                   | ★                         | –                                             | ★★                                                              | ★                     | ★                   | ★     | ★★★★★★   | Good                             |
| Lim et al., 2017 [25]       | ★                                        | ★                                   | ★                         | ★                                             | ★★                                                              | ★                     | ★                   | ★     | ★★★★★★   | Good                             |

\* Good quality: 3 or 4 stars in selection domain AND 1 or 2 stars in comparability domain AND 2 or 3 stars in outcome/exposure domain

Fair quality: 2 stars in selection domain AND 1 or 2 stars in comparability domain AND 2 or 3 stars in outcome/exposure domain

Poor quality: 0 or 1 star in selection domain OR 0 stars in comparability domain OR 0 or 1 stars in outcome/exposure domain
